# Supplementary material for: Draft genome sequence of Bacillus amyloliquefaciens subsp. plantarum strain Fito_F321, an endophyte microorganism from Vitis vinifera with biocontrol potential
Source: Stand Genomic Sci. 2018 Nov 1;13:30. doi: 10.1186/s40793-018-0327-x (PMC6211603; doi:10.1186/s40793-018-0327-x)
Supplement: Supplementary file 1 — Table S1. General overview of genes involved in bacterium-plant interaction in B. amyloliquefaciens subsp. plantarum strain Fito_F321. (XLSX 11 kb) [file 40793_2018_327_MOESM1_ESM.xlsx]

## Sheet: Feuil1
Locus tag ID	Gene	Function
Motility (swarming), biofilm formation and root colonization
BVY13_00370	fliZ	Flagellar biosynthesis protein
BVY13_14075	flgC	Flagellar biosynthesis protein
BVY13_00340	flhF	Flagellar biosynthesis protein
BVY13_00345	flhA	Flagellar biosynthesis protein
BVY13_00350	flhB	Flagellar biosynthetic protein
BVY13_00355	fliR	Flagellar biosynthetic protein
BVY13_00360	fliQ	Flagellar biosynthetic protein
BVY13_00365	fliP	Flagellar biosynthetic protein
BVY13_00430	fliH	Flagellar assembly protein
BVY13_02330	fliW	Flagellar assembly protein
BVY13_00390	fliL	Flagellar basal body-associated protein
BVY13_00400	flgF	Flagellar basal-body rod protein
BVY13_00455	flgB	Flagellar basal-body rod protein
BVY13_00420	fliJ	Flagellar export protein
BVY13_02345	fliD	Flagellar filament capping protein
BVY13_00405	flgD	Flagellar hook assembly protein
BVY13_02315	flgK	Flagellar hook-associated protein
BVY13_02320	flgL	Flagellar hook-associated protein 3
BVY13_00445	fliE	Flagellar hook-basal body complex protein
BVY13_14080	flhP	Flagellar hook-basal body protein
BVY13_02340	hag	Flagellin
BVY13_01750	motB	Flagellar motor protein
BVY13_00380	fliY	Flagellar motor switch phosphatase
BVY13_00435	fliG	Flagellar motor switch protein
BVY13_00385	fliM	Flagellar motor switch protein
BVY13_00440	fliF	Flagellar M-ring protein
BVY13_02350	fliS	Flagellar protein
BVY13_02310	flgN	Flagellar protein
BVY13_02355	fliT	Flagellar protein
BVY13_00425	fliI	Flagellar protein export ATPase
BVY13_02305	flgM	Negative regulator of flagellin synthesis
BVY13_00325	cheA	Chemotaxis protein CheA
BVY13_00310	cheD	Chemotaxis protein CheD
BVY13_01575	cheV	Chemotaxis protein CheV
BVY13_00320	cheW	Chemotaxis protein CheW
BVY13_02415	swrA	Swarming motility protein SwrA
BVY13_00300	swrB	Swarming motility protein SwrB
BVY13_18860	swrC	Swarming motility protein SwrC
BVY13_05345	spo0A	Sporulation transcription factor Spo0A
Plant-growth promotion (synthesis of IAA, nitrogen fixation, phosphate, siderophores/ iron)
BVY13_06245	trpA	Tryptophan synthase subunit alpha
BVY13_06240	trpB	Tryptophan synthase subunits beta
BVY13_06220	trpE	Anthranilate synthase component I
BVY13_17360	bdhA	butanediol dehydrogenase
BVY13_14285	als	acetolactate synthase
BVY13_09195	alsS	acetolactate synthase small subunit
BVY13_14290	alsD	acetolactate decarboxylase
BVY13_07365	alsR	LysR family transcriptional regulator (regulator of alsDS operon)
BVY13_15695	narG	Nitrate reductase subunit alpha
BVY13_15700	narH	Nitrate reductase subunit beta
BVY13_15710	narI	Respiratory nitrate reductase subunit gamma
BVY13_03720	nifU	Iron-sulfur cluster assembly scaffold protein NifU
BVY13_12380	nifS	Cysteine desulfurase NifS
BVY13_14525	nirK	Nitric oxide synthase (NOS)
BVY13_15080	phy	3-phytase
BVY13_11530	-	inositol 2-dehydrogenase (IDH)
BVY13_07500	-	Iron ABC transporter permease
BVY13_03475	-	Iron ABC transporter ATP-binding protein
BVY13_18400	-	Iron ABC transporter permease
BVY13_18410	-	Iron-uptake system-binding protein
BVY13_07505	-	Iron ABC transporter ATP-binding protein
BVY13_13235	fetB	Iron export ABC transporter permease subunit FetB
Antimicrobial resistance genes
BVY13_12675	fosB	Fosfomycin resistance protein
BVY13_11500	bcr	Bacitracin ABC transporter ATP-binding protein
BVY13_08560	-	tetracycline resistance MFS efflux pump
